# Supplementary material
Source: PubMed Central journal article supplement (PMC6369450)
Supplement: mmc1.pdf [file mmc1.pdf]

**YMTHE, Volume 27**

## **Supplemental Information**

**Engineered DNA Vaccination against**

**Follicle-Stimulating Hormone Receptor Delays**

**Ovarian Cancer Progression in Animal Models**

**Alfredo Perales-Puchalt, Krzysztof Wojtak, Elizabeth K. Duperret, Xue Yang, Anna M. Slager, Jian Yan, Kar Muthumani, Luis J. Montaner, and David B. Weiner**

## SUPPLEMENTAL FIGURES

## SUPPLEMENTAL FIGURE 1

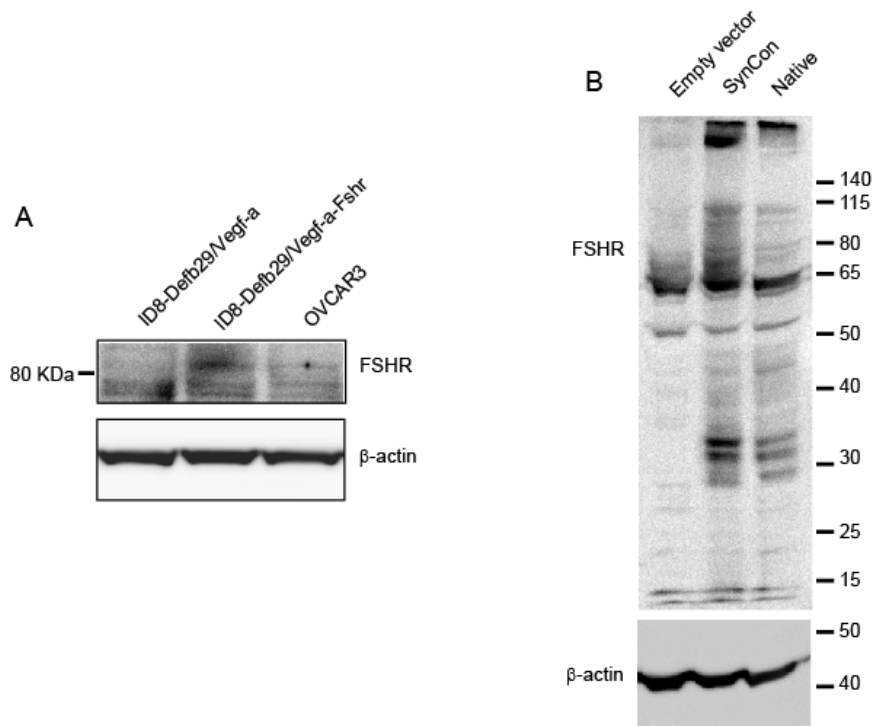

**Supplemental Figure 1. Expression of SynCon and native FSHR vaccines.** Western blot of protein derived from (A) OVCAR3, ID8-Defb29/Vegf-a-Fshr and ID8-Defb29/Vegf-a and (B) murine FSHR SynCon vaccine, murine native FSHR vaccine or empty vector transfected 293T cells (10% gel MOPS buffer) blotted for FSHR and  $\beta$ -actin (representative of 2 experiments)

## SUPPLEMENTAL FIGURE 2

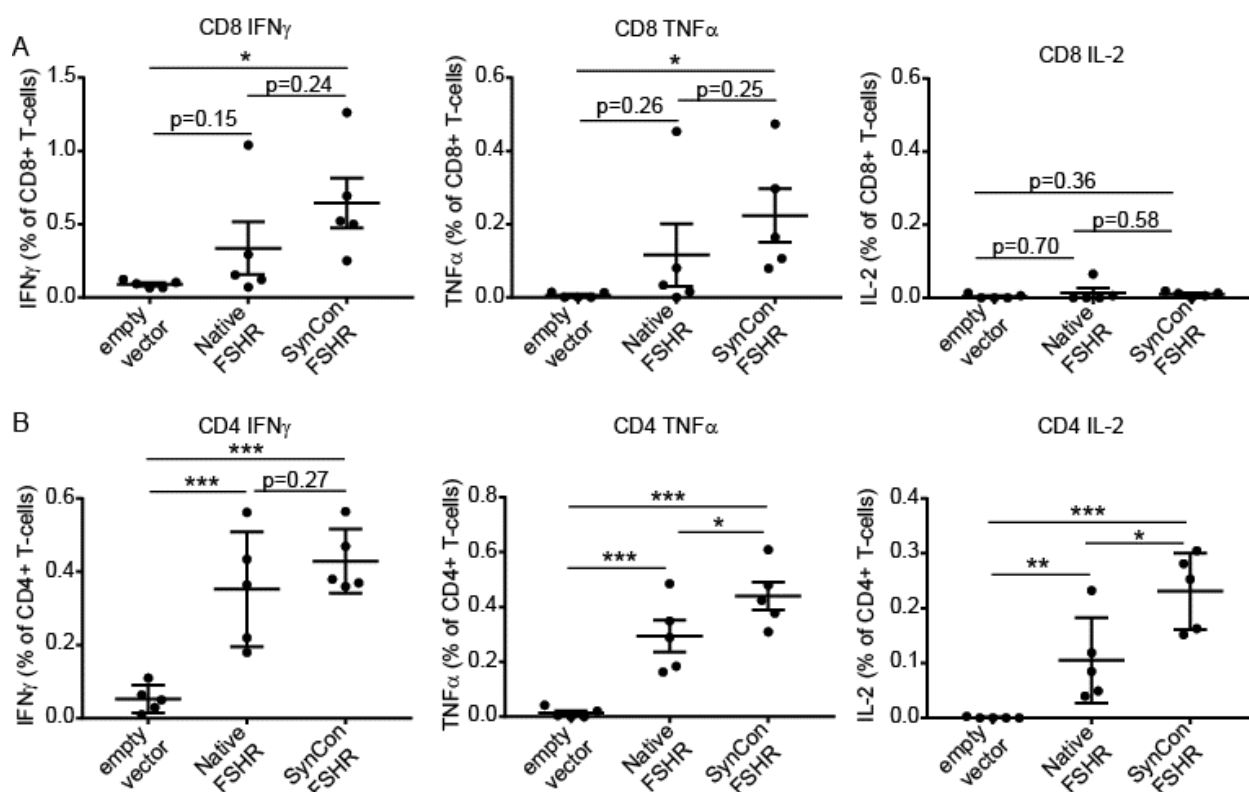

**Supplemental Figure 2. Mouse FSHR DNA vaccine generates strong CD8 and CD4 responses when pulsed with vaccine matched peptides.** Percentage of IFN $\gamma$ , TNF $\alpha$  and IL-2 produced by (A) CD8+ or (B) CD4+ T cells from the spleen of mice immunized with FSHR SynCon vaccine, FSHR native vaccine or empty vector stimulated with consensus vaccine matched peptides. ANOVA. \* $p < 0.05$ , \*\* $p < 0.01$ , \*\*\* $p < 0.001$ .

## SUPPLEMENTAL FIGURE 3

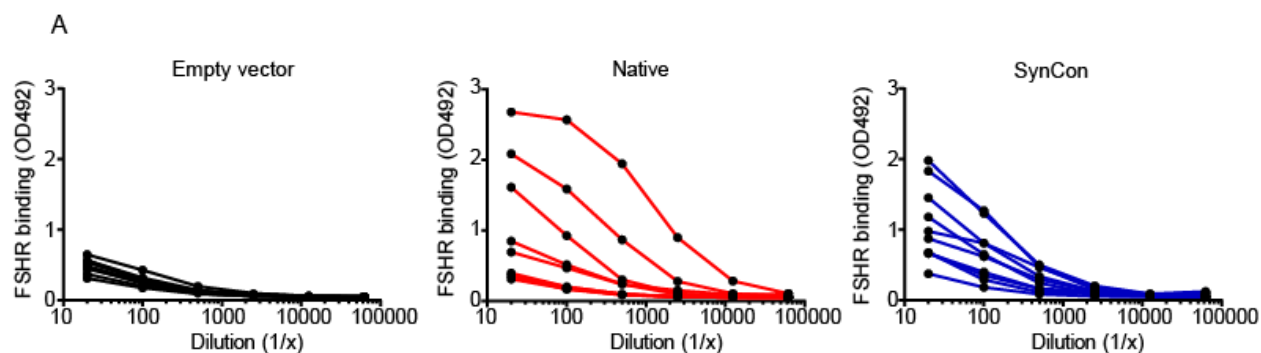

**Supplemental Figure 3. Mouse FSHR DNA vaccine generates antibodies against FSHR.** (A) Binding of sera from mice vaccinated with FSHR vaccine, native FSHR or pVAX empty vector to the extracellular domain of native murine FSHR in a binding ELISA. Each curve represents one mouse.

## SUPPLEMENTAL FIGURE 4

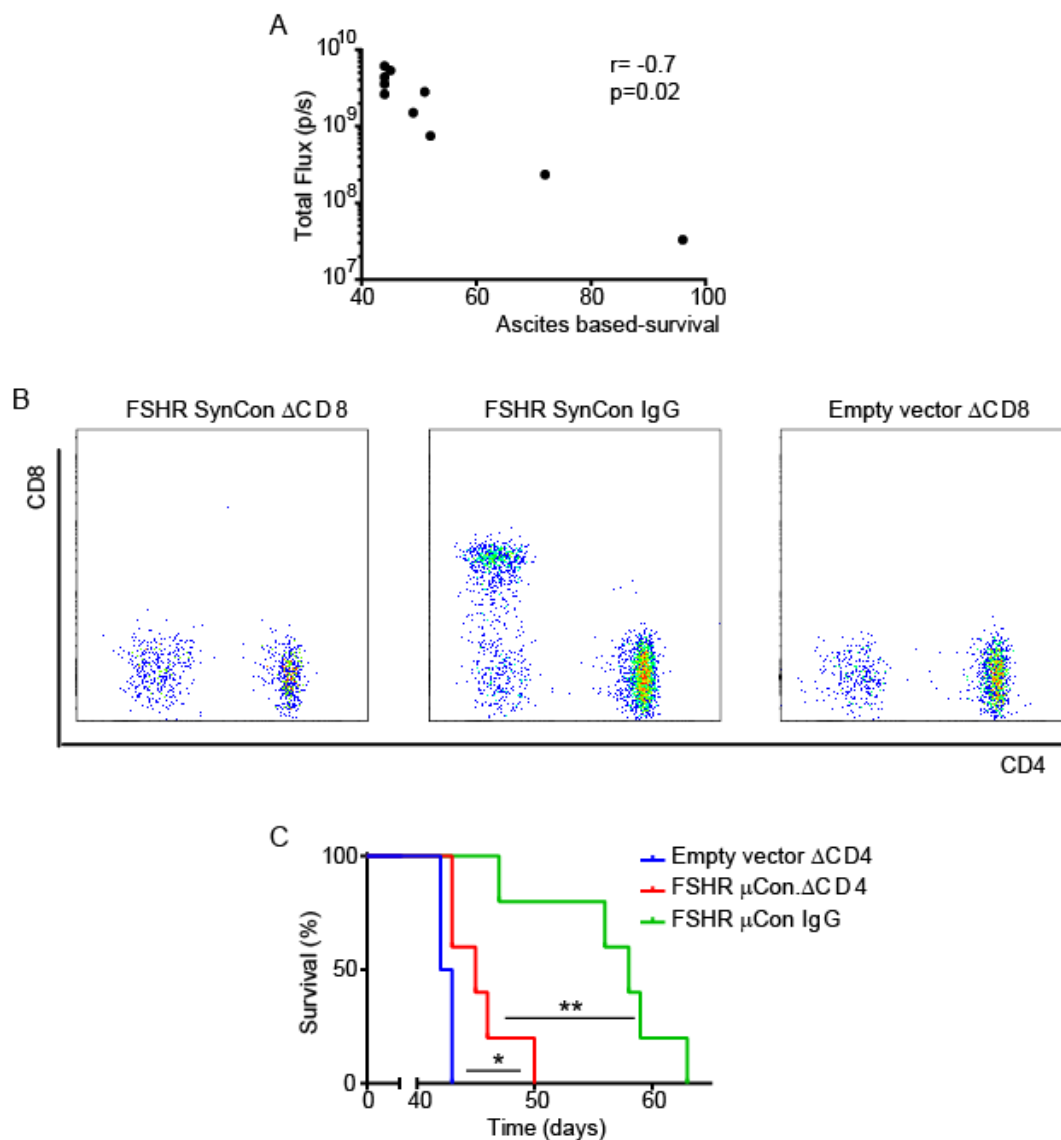

**Supplemental Figure 4. CD8 and CD8 depletion experiment. (A)** Correlation between luciferase expression and ascites-based survival in luciferase transfected ID8-*Defb29/Vegf-a-Fshr* tumor challenge. **(B)** We vaccinated mice and challenged with ID8-*Defb29/Vegf-a-Fshr* one week after the last immunization. One day prior to the tumor challenge and twice weekly thereafter we administered either anti-mouse CD8 or rat polyclonal IgG. Flow plots showing CD4<sup>+</sup> and CD8<sup>+</sup> T cells in the tumor microenvironment of the different groups at day 21 after tumor inoculation. **(C)** Survival plot of the FSHR SynCon vaccine or pVAX empty vector with or without CD8 depletion (n=5 mice per group). Pearson correlation, Log-rank. \*p<0.05, \*\*p<0.01

## SUPPLEMENTAL FIGURE 5

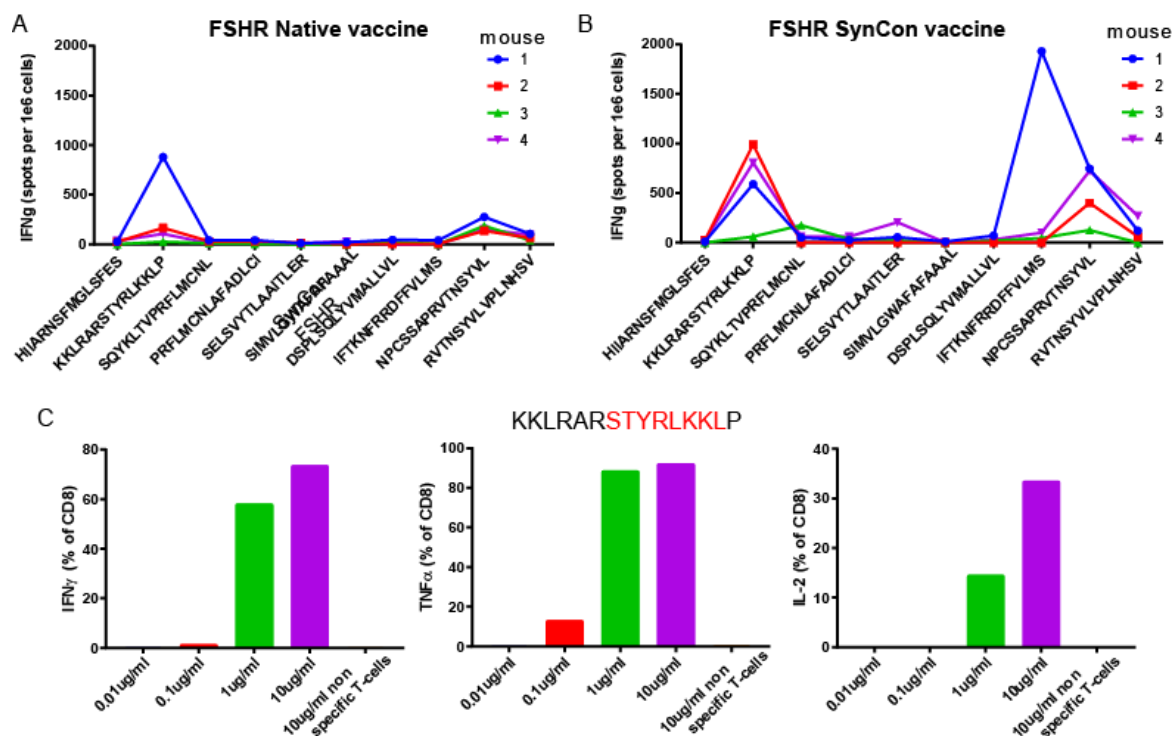

**Supplemental Figure 5. Murine FSHR SynCon vaccine increases the number and intensity of immunogenic sequences of FSHR.** (A&B) IFN $\gamma$  ELISpot of splenocytes from mice immunized with murine FSHR SynCon vaccine, native FSHR vaccine or empty vector pulsed with FSHR derived peptides predicted to bind with high affinity to H2-K(b) or H2-D (b) (n=4 mice per group). (C) Percentage of IFN $\gamma$ , TNF $\alpha$  and IL-2 produced by CD8<sup>+</sup> T cells expanded from mice immunized with murine FSHR SynCon vaccine expanded with KKLRRARSTYRLKKLP peptides and stimulated with the same peptides at different doses.

## SUPPLEMENTAL FIGURE 6

## A IEDB Analysis Resource

Home Help Example Reference Download Contact

## MHC-I Binding Prediction Results

Input Sequences

| # | Name                                                                                                  | Sequence                                                                                                                                                                                                                                                                                                                                                                                                                                                                                                                                                                                                                                                                                                                                      |
|---|-------------------------------------------------------------------------------------------------------|-----------------------------------------------------------------------------------------------------------------------------------------------------------------------------------------------------------------------------------------------------------------------------------------------------------------------------------------------------------------------------------------------------------------------------------------------------------------------------------------------------------------------------------------------------------------------------------------------------------------------------------------------------------------------------------------------------------------------------------------------|
| 1 | sp P35378 FSHR_MOUSE Follicle-stimulating hormone receptor DE=Mus musculus CX-10090 GN=Fshr FE-2 SV-2 | MALLLVSLAFLGSGSGCHHLLCHSNRVFLCODSKVTEIPDLPRIVAIE<br>LRFVLTSLRVIPKGFSGCTDLEKICISQNDVLCVICADVSNLPNLIICI<br>RIEKANNLLYINPEAFQNLPSLRVLLISATGIRKLPAPFKIQSLQKVLLD<br>IQDRIINIHIIARNSFMGLSFESVILWLNKNGIQEIHCAFNGTQLDELNL<br>SDNNI FFI PNDVFGAGSGPVVITPSTKVVYSPIHKKI RARSTY<br>RLKXKLSLDKFWLIEASLTVPSHCCAFANIRQTSLELHPICIKSIESRD<br>IDDMTPGDQFVSLVDDEPSYKSGDMLYSEGDYDLNCFVDVTCSPK<br>AFNPCCDINGVILRVLIWFSILAITGNTTVLWLTTSQYKLTVPRLM<br>CNLAFADLCIGIYLLIASVDIHTKSCVHVAIDMQTGAGCDAAGFFTVF<br>ASFI SVYTI AATTI FRMHTTTHAQI FCKVQI CHAASTPM GWAFAPAAA<br>LFPZFGISSYKVSICLPHNDISPLSOLYVWLLVNLALAFVVICGCTYH<br>IYLTVRNPNIVSSRDTKIAKRNATLITDGLMAPILFTAISAGLVPL<br>ITVSKKILLVLFYFINSCLMPLVAFITKFRDRDFVLSKFGCYEVQA<br>QIVKTESSITHNFSSKKNPCSSAPRVTSVWLVPLNHSVQN |

Prediction method: IEDB recommended | Low percentile\_rank = good binders

Download result

Citations

Check to expand the result: 

| Allele | # | Start | End | Length | Peptide   | Method used         | Percentile_rank | ANN IC50(nM) | ANN rank | SMM IC50(nM) | SMM rank |
|--------|---|-------|-----|--------|-----------|---------------------|-----------------|--------------|----------|--------------|----------|
| H-2-Kb | 1 | 455   | 462 | 8      | SVYTLAAI  | Consensus (ann/smm) | 0.3             | 11.70        | 0.2      | 75.24        | 0.4      |
| H-2-Kb | 1 | 401   | 408 | 8      | CNLAFADL  | Consensus (ann/smm) | 0.25            | 24.33        | 0.2      | 48.75        | 0.3      |
| H-2-Kb | 1 | 679   | 686 | 8      | NSYVLVPL  | Consensus (ann/smm) | 0.3             | 32.62        | 0.3      | 53.30        | 0.3      |
| H-2-Kb | 1 | 248   | 255 | 8      | STYRLKKL  | Consensus (ann/smm) | 0.35            | 35.52        | 0.3      | 68.35        | 0.4      |
| H-2-Kb | 1 | 527   | 534 | 8      | QIYVPAI I | Consensus (ann/smm) | 0.55            | 72.50        | 0.3      | 174.46       | 0.6      |

## B IEDB Analysis Resource

Home Help Example Reference Download Contact

## MHC-I Processing Prediction Results

Input Sequences

| # | Name                                                                                                  | Sequence                                                                                                                                                                                                                                                                                                                                                                                                                                                                                                                                                                                                                                                                                                                                                                                               |
|---|-------------------------------------------------------------------------------------------------------|--------------------------------------------------------------------------------------------------------------------------------------------------------------------------------------------------------------------------------------------------------------------------------------------------------------------------------------------------------------------------------------------------------------------------------------------------------------------------------------------------------------------------------------------------------------------------------------------------------------------------------------------------------------------------------------------------------------------------------------------------------------------------------------------------------|
| 1 | sp P35378 FSHR_MOUSE Follicle-stimulating hormone receptor DE=Mus musculus CX-10090 GN=Fshr FE-2 SV-2 | MALLLVSLAFLGSGSGCHHLLCHSNRVFLCODSKVTEIPDLPRIVAIE LRFVLTSLRVIPKGFSGCTDLEKICISQNDVLCVICADVSNLPNLIICI UNLPSLHVLLENIKRLHUA-HKIQSLQKVLLDUNNIIHIIARNSFMGLSFESVILWLNKNGIQEIHCAFNGTQLDELNL SDNNI FFI PNDVFGAGSGPVVITPSTKVVYSPIHKKI RARSTY LPHGLENLKLRARSTYRLKXKLSLDKFWLIEASLTVPSHCCAFANIRQTSLELHP ICIKSIESRDIDDMTPGDQFVSLVDDEPSYKSGDMLYSEGDYDLNCFVDVTCSPK FDFANPCDDINGVILRVLIWFSILAITGNTTVLWLTTSQYKLTVPRLM CNLAFADLCIGIYLLIASVDIHTKSCVHVAIDMQTGAGCDAAGFFTVF LLLGGLYLLLVSLVLIHTKSCVHVAIDMQTGAGCDAAGFFTVFISEL SVYTLVPLITL FRMHTTTHAQI FCKVQI CHAASTPM GWAFAPAAA LFPZFGISSYKVSICLPHNDISPLSOLYVWLLVNLALAFVVICGCTYH SPSOLYVWLLVNLALAFVVICGCTYH IYLTVRNPNIVSSRDTKIAKRNATLITDGLMAPILFTAISAGLVPL FLCNAPLFFAISASLVPLITVSKKILLVLFYFINSCLMPLVAFITKFRDRDFVLSKFGCYEVQA LNSKFGCYEVQAQIVKTESSITHNFSSKKNPCSSAPRVTSVWLVPLNHSVQN |

Prediction method: recommended | High Score = high efficiency

Download result

Citations

| Allele | # | Start | End | Peptide Length | Peptide       | Proteasome Score | TAP Score | MHC Score | Processing Score | Total Score | MHC IC50[nM] |
|--------|---|-------|-----|----------------|---------------|------------------|-----------|-----------|------------------|-------------|--------------|
| H-2-Kb | 1 | 488   | 501 | 14             | LVNLGMNFAAVIL | 1.39             | 0.54      | -1.21     | 1.93             | 0.72        | 18.2         |
| H-2-Kb | 1 | 490   | 501 | 12             | VLGMVFAVAL    | 1.39             | 0.40      | -1.21     | 1.79             | 0.56        | 18.2         |
| H-2-Kb | 1 | 493   | 501 | 9              | WAFAPDAL      | 1.39             | 0.46      | -1.58     | 1.85             | 0.50        | 22.7         |
| H-2-Kb | 1 | 490   | 502 | 13             | VLGMVFAAALF   | 1.20             | 1.08      | -1.81     | 2.26             | 0.47        | 84.6         |
| H-2-Kb | 1 | 489   | 501 | 13             | MVLGMVFAAAL   | 1.39             | 0.51      | -1.45     | 1.90             | 0.44        | 26.5         |
| H-2-Kb | 1 | 248   | 255 | 8              | STYRLKKL      | 1.52             | 0.57      | -1.06     | 2.08             | 0.42        | 45.7         |
| H-2-Kb | 1 | 100   | 100 | 9              | TARNFPRGI     | 1.47             | 0.47      | -1.05     | 1.94             | 0.28        | 44.9         |

**Supplemental Figure 6. STYRLKKL is an FSHR derived octamer predicted to be efficiently processed and bind H2-K(b) with high affinity.** (A) Screenshot showing the binding prediction to MCH-I of 8-mers derived from murine FSHR to H2-K(b) and H2-D(b) using the immunopeptide database (<http://tools.iedb.org/mhci/>). (B) Screenshot showing the proteasome and TAP processing prediction of all potential FSHR-derived peptides and binding to H2-K(b) and H2-D(b) using the immunopeptide database (<http://tools.iedb.org/processing/>).

**SUPPLEMENTAL METHODS****Mouse SynCon FSHR DNA sequence**

ATGGA CTGGACCTGGATTCTGTTCTTGGTGGCCGCTGCCACAAGGGTGC ACTCCTGC  
CACC ACTGGCTGTGCCACTGTTCTAACAGGGTGTTCCTGTGCCAGGACAGCAAGGTG  
ACCGAGATCCCTCCCGATCTGCCCCGGAACGCCATCGAGCTGCGCTTCGTGCTGACA  
AAGCTGAGAGTGATCCCTAAGGGCTCCTTCTCTGGCTTTGGAGATCTGGAGAAGATC  
GAGATCTCCAGAACGACGTGCTGGAAGTGATCGAGGCCGACGTGTT CAGCAACCT  
GCCTAAGCTGCACGAGATCCGGATCGAGAAGGCCAACACCTGCTGTACATCAACC  
CCGAGGCTTTCCAGAACCTGCCTAGCCTGCGCTACCTGCTGATCTCCAACACCGGCA  
TCAAGCACCTGCCAGCCGTGCACAAGATCCAGAGCCTGCAGAAGGTGCTGCTGGAC  
ATCCAGGATAACATCAACATCCACATCATCGCTAGAACTCCTTCATGGGACTGTCT  
TTTGAGAGCGTGATCCTGTGGCTGAACAAGAACGGCATCCAGGAGATCCACA ACTG  
TGCCTTTAACGGAACACAGCTGGACGAGCTGAACCTGTCTGATAACAACAACCTGG  
AGGAGCTGCCTAACGACGTGTTCCAGGGCGCCAGCGGACCAGTGATCCTGGATATC  
TCCAGGACCAAGGTGCACTCTCTGCCCAACCACGGCCTGGAGAACCTGAAGAAGCT  
GAGGGCCAGATCCACATACAGACTGAAGAAGCTGCCTTCTCTGGACAAGTTCGTGA  
CCCTGATGGAGGCTTCTCTGACATAACCAAGCCACTGCTGTGCCTTTGCTAACTGGA  
GGAGACAGATCAGCGAGCTGCACCCAATCTGTAACAAGTCCATCCTGCGGCAGGAC  
ATCGACGATATGACCCAGATCGGAGATCAGCGCGTGAGCCTGATCGACGATGAGCC  
CTCCTACGGCAAGGGATCTGACATGATGTACAGCGAGTTCGACTTTGATCTGTGCAA  
CGAGGTGGTGGATGTGACATGTTCCCAAAGCCCGACGCCTTCAACCCCTGCGAGG  
ATATCATGGGCTACAACATCCTGCGGGTGCTGATCTGGTTTATCTCCATCCTGGCTAT  
CACCGGAAACACCACAGTGCTGGTGGTGGT GACCACATCTCAGTACAAGCTGACAG  
TGCCTCGCTTCTGATGTGCAACCTGGCCTTTGCTGACCTGTGCATCGGCATCTACCT  
GCTGCTGATCGCCTCTGTGGATATCCACACCAAGAGCCAGTACCACA ACTACGCCAT  
CGACTGGCAGACCGGCGCTGGATGTGATGCTGCCGGATTCTTTACAGTGTTGCGCTC  
CGAGCTGAGCGTGTAACCCCTGACAGCTATCACCCCTGGCCAGGGCTCACACCATCAC  
ACACGCCATGCAGCTGGAGTGCAAGGTGCAGCTGAGACACGCTGCCTCTATCATGG  
TGCTGGGCTGGACATTCGCTTTTGCTGCCGCTCTGTTCCCAATCTTTGGAATCAGCTC  
CTACATGAAGGTGTCCATCTGTCTGCCTATGGACATCGATAGCCCACTGTCCCAGCT  
GTACGTGATGGCCCTGCTGGTGGTGAACGTGCTGGCCTTCGTGGTCATCTGCGGCTG  
TTACACCCACATCTACCTGACAGTGCGGAACCCCAACATCGTGTCTAGCTCCTCTGA  
CACCAAGATCGCCAAGCGCATGGCTACCCTGATCTTCACAGATTTTCTGTGCATGGC  
CCCAATCAGCTTCTTTGCCATCAGCGCCTCCCTGAAGGTGCCCTGATCACCGTGAG  
CAAGGCTAAGATCCTGCTGGTGGTGTCTTCTACCCAATCAACTCCTGCGCCAACCCCTT  
TCTGTACGCTATCTTCACAAAGAACTTTCGGCGCGACTTCTTTATCCTGATGAGCAA  
GTTCCGGATGTTACGAGATGCAGGCCAGATCTACCGGACCGAGACAAGCTCCGCCA  
CCCACA ACTTTCACGCTAGGAAGTCCC ACTGCAGCAGCGCCCCAGGGTGACAAAC  
TCTTACGTGCTGGTGCCTCTGAACCACAGCGTG CAGA ACTGATAA
